# Supplementary material
Source: PubMed Central journal article supplement (PMC4929987)
Supplement: NIHMS758071-supplement-1.pdf [file NIHMS758071-supplement-1.pdf]

## Supplementary Information

### **A simple physical mechanism enables homeostasis in primitive cells**

Aaron E. Engelhart, Katarzyna Adamala, and Jack W. Szostak\*

\*correspondence to: szostak@molbio.mgh.harvard.edu

**Supplementary Information Table 1.** Predicted thermodynamics for association of **HH-B** with inhibitor sequences and **HH-A** fragments.

**Supplementary Information Figure 1.** Concentration dependence of cleavage of **HH-A/HH-B**-inhibitor complexes.

**Supplementary Information Figure 2.** Cleavage yields of **HH-A/HH-B**-inhibitor mixtures.

**Supplementary Information Figure 3.** Schematic illustration of effects of dilution on ribozyme assembly in the absence (left) and presence (right) of inhibitors **HH-I-3/9/10**.

**Supplementary Information Table 2.** Cleavage rates for hammerhead ribozyme systems in presence and absence of inhibitor oligonucleotides.

**Supplementary Information Figure 4.** Inactive Inhibitor-**HH-B** complexes capable of activation by dilution are formed regardless of order of addition.

**Supplementary Information Figure 5.** Calibration curve and growth of MA/GMO/DOPA vesicles in the presence of MA/GMO vesicles.

**Supplementary Information Figure 6.** Volume growth of MA/GMO/DOPA vesicles.

**Supplementary Information Figure 7.** Yields of full-length RNA products (a) and truncation products (b) predicted based on stepwise coupling efficiency.

**Supplementary Information Table 3.** Relative yields and concentrations of full-length and short RNAs predicted based on stepwise coupling efficiency.

**Supplementary Information Figure 8.** Control ethanol precipitation demonstrating identical recovery efficiency for **HH-A** and its ribozyme cleavage product.

**Supplementary Information Figure 9.** Electropherogram showing **HH-A** and cleavage product alongside RNA size marker.

**Supplementary Information Figure 10.** Repurification of vesicles demonstrating oligonucleotide contents are retained on the experimental timescale.

| Name        | Sequence (shown aligned to HH-B) | Complementary Residues in HH-B | $\Delta G_{298K}$ (kcal/mol) | $\log(K_{Dcalc, 298K})$ |
|-------------|----------------------------------|--------------------------------|------------------------------|-------------------------|
| HH-I-1      | 5' - UCAGU - 3'                  | 7-11                           | -4.22                        | -3.1                    |
|             | 3' - GCGCGGAGUAGUCAGCUCGG - 5'   |                                |                              |                         |
| HH-I-2      | 5' - <b>UGUCUU</b> - 3'          | 13-18                          | -4.54                        | -3.3                    |
|             | 3' - GCGCGGAGUAGUCAGCUCGG - 5'   |                                |                              |                         |
| HH-I-3      | 5' - UCGAG - 3'                  | 3-7                            | -5.21                        | -3.8                    |
|             | 3' - GCGCGGAGUAGUCAGCUCGG - 5'   |                                |                              |                         |
| HH-I-4      | 5' - AUCAGU - 3'                 | 7-12                           | -5.71                        | -4.2                    |
|             | 3' - GCGCGGAGUAGUCAGCUCGG - 5'   |                                |                              |                         |
| HH-I-5      | 5' - <b>UGUCUU</b> - 3'          | 13-18                          | -5.92                        | -4.4                    |
|             | 3' - GCGCGGAGUAGUCAGCUCGG - 5'   |                                |                              |                         |
| HH-I-6      | 5' - CUCAUC - 3'                 | 10-15                          | -7.04                        | -5.2                    |
|             | 3' - GCGCGGAGUAGUCAGCUCGG - 5'   |                                |                              |                         |
| HH-I-7      | 5' - AGUCGA - 3'                 | 4-9                            | -7.31                        | -5.4                    |
|             | 3' - GCGCGGAGUAGUCAGCUCGG - 5'   |                                |                              |                         |
| HH-I-8      | 5' - GCCUC - 3'                  | 13-17                          | -7.90                        | -5.8                    |
|             | 3' - GCGCGGAGUAGUCAGCUCGG - 5'   |                                |                              |                         |
| HH-I-9      | 5' - CGCGC - 3'                  | 16-20                          | -8.34                        | -6.1                    |
|             | 3' - GCGCGGAGUAGUCAGCUCGG - 5'   |                                |                              |                         |
| HH-I-10     | 5' - UCAUCAG - 3'                | 8-14                           | -8.92                        | -6.6                    |
|             | 3' - GCGCGGAGUAGUCAGCUCGG - 5'   |                                |                              |                         |
| HH-A-5pStem | 5' - CGCGCC - 3'                 | 15-20                          | -12.06                       | -8.9                    |
|             | 3' - GCGCGGAGUAGUCAGCUCGG - 5'   |                                |                              |                         |
| HH-A-3pStem | 5' - UCGAGC - 3'                 | 3-8                            | -9.17                        | -6.8                    |
|             | 3' - GCGCGGAGUAGUCAGCUCGG - 5'   |                                |                              |                         |

**Supplementary Information Table 1. Predicted thermodynamics for association of HH-B with inhibitor sequences and HH-A fragments.** The above series of 5-7 nt partial complements to **HH-B** were selected to represent a range of binding affinities for **HH-B** (ca. 250 nM-800  $\mu$ M  $K_{Dcalc}$ ). In some cases, inhibitors form G-U mismatches when hybridized to **HH-B**; the U residues involved are shown in bold. Affinities of **HH-I-1** through **HH-I-10**, **HH-A-5pStem**, and **HH-A-3pStem** for **HH-B** were calculated using MELTING 5.1.0<sup>18,19</sup>.

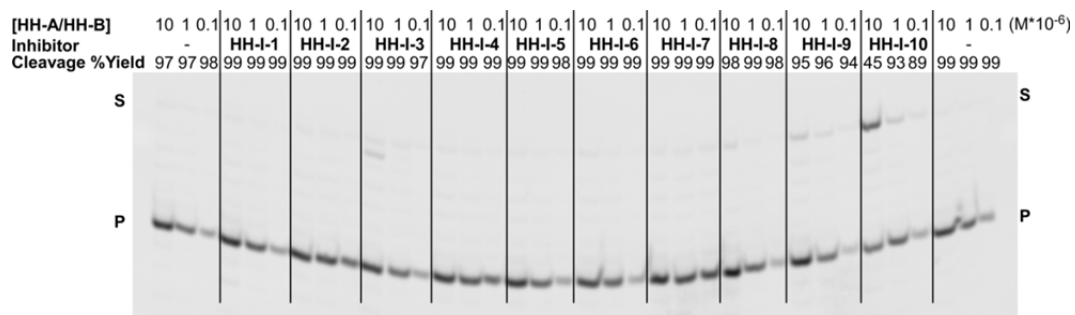

**Supplementary Information Figure 1. Concentration dependence of cleavage of HH-A/HH-B-inhibitor complexes.** Reactions were incubated overnight in 100mM sodium HEPES pH 7.5, 10 mM MgCl<sub>2</sub>, 1 mM sodium EDTA pH 8, at the specified concentration of **HH-A** and **HH-B** (10 μM, 1 μM, or 100 nM), with 100 eq. of inhibitor (i.e., 1 mM, 100 μM, or 10 μM) present. Substrate (**HH-A**) is denoted as **S**; cleavage product is denoted as **P**. Lines separating reaction series do not denote separate gels; rather, they are intended to guide the eye.

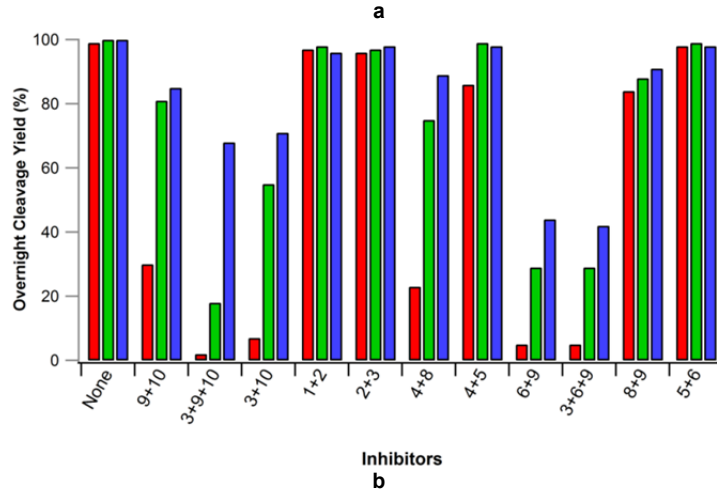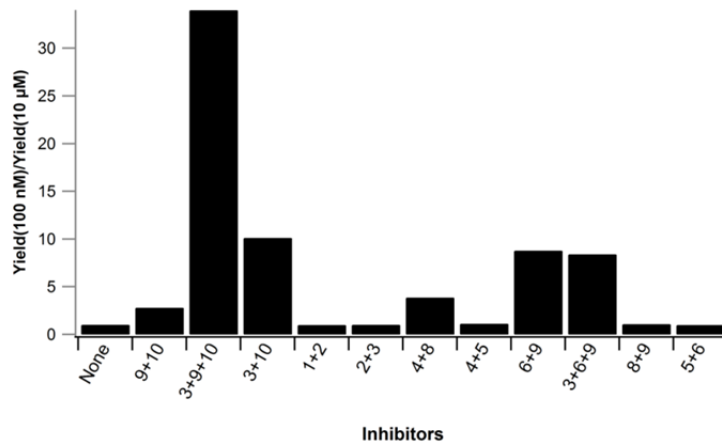

**c**

| [HH]                           | Inhibitors |        |      |     |     |     |     |     |       |     |     |      |
|--------------------------------|------------|--------|------|-----|-----|-----|-----|-----|-------|-----|-----|------|
|                                | 9+10       | 3+9+10 | 3+10 | 1+2 | 2+3 | 4+8 | 4+5 | 6+9 | 3+6+9 | 8+9 | 5+6 | None |
| 10 μM                          | 30         | 2      | 7    | 97  | 96  | 23  | 86  | 5   | 5     | 84  | 98  | 99   |
| 1 μM                           | 81         | 18     | 55   | 98  | 97  | 75  | 99  | 29  | 29    | 88  | 99  | 100  |
| 100 nM                         | 85         | 68     | 71   | 96  | 98  | 89  | 98  | 44  | 42    | 91  | 98  | 100  |
| Yield(100 nM)/<br>Yield(10 μM) | 2.8        | 34     | 10   | 1.0 | 1.0 | 3.9 | 1.1 | 8.8 | 8.4   | 1.1 | 1.0 | 1.0  |

**Supplementary Information Figure 2. Cleavage yields of HH-A/HH-B-inhibitor mixtures.**

Reactions were incubated overnight in 100 mM sodium HEPES pH 7.5, 10 mM MgCl<sub>2</sub>, 1 mM sodium EDTA pH 8, at the specified concentration of both **HH-A** and **HH-B**, with 100 eq. (i.e., 1 mM, 100 μM, or 10 μM) of each inhibitor strand noted. **a**) Cleavage yields vs. **HH-A/HH-B** concentration: red=10 μM, green=1 μM, blue=100 nM. **b**) Ratio of 10 μM to 100nM cleavage yields. **c**) Data in panels **a** and **b** in tabular format.

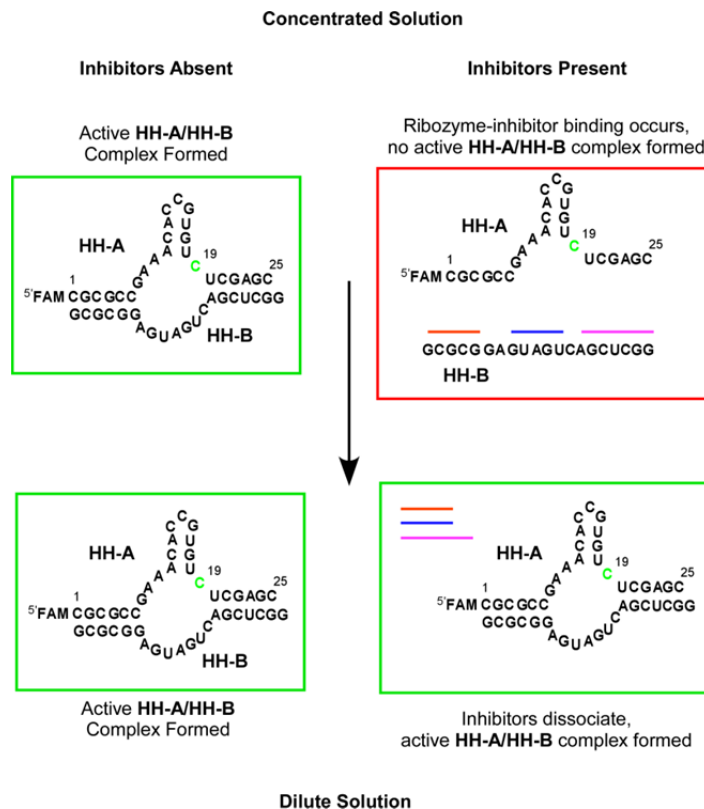

**Supplementary Information Figure 3. Schematic illustration of effects of dilution on ribozyme assembly in the absence (left) and presence (right) of inhibitors HH-I-3/9/10.** In the absence of inhibitors, the catalytically active **HH-A-HH-B** complex is stable over the concentration range studied and is not impacted greatly by dilution from 10  $\mu\text{M}$  to 0.1  $\mu\text{M}$ . (Left) **HH-B**, when at high concentration and in the presence of an excess of complementary inhibitors, is sequestered in a complex with these strands; it does not participate in the **HH-A-HH-B** complex. (Right, top) Upon dilution, the weakly-binding inhibitors dissociate from **HH-B**, allowing it to interact with **HH-A**, forming the catalytically active **HH-A-HH-B** complex. (Right, bottom) The cytosine residue 5' to the cleavage site is shown in red; the 5'-fluorescein end label on **HH-A** is denoted with a green star.

| Partial Complements Present                             | Apparent rate constant (hr <sup>-1</sup> ) |                     |                       |                                           |                                                                   | $\frac{d([P])/dt_{t=0, \text{ post-growth}}}{d([P])/dt_{t=0, \text{ pre-growth}}}$<br>(P=ribozyme product) |
|---------------------------------------------------------|--------------------------------------------|---------------------|-----------------------|-------------------------------------------|-------------------------------------------------------------------|------------------------------------------------------------------------------------------------------------|
|                                                         | 10 $\mu$ M HH-A/HH-B                       | 1 $\mu$ M HH-A/HH-B | 0.1 $\mu$ M HH-A/HH-B | 1 $\mu$ M HH-A/HH-B In Vesicles No Growth | 1 $\mu$ M HH-A/HH-B In Vesicles After Growth+Volume Equilibration |                                                                                                            |
| None                                                    | 0.65±0.02                                  | 0.52±0.03           | 0.32±0.03             | 0.23±0.02                                 | 0.11±0.02                                                         | 0.096                                                                                                      |
| 100 eq. HH-I-3                                          | 0.48±0.03                                  | 0.26±0.02           | 0.21±0.03             |                                           |                                                                   |                                                                                                            |
| 100 eq. HH-I-9                                          | 0.24±0.01                                  | 0.21±0.01           | 0.19±0.02             |                                           |                                                                   |                                                                                                            |
| 100 eq. HH-I-10                                         | 0.030±0.001                                | 0.07±0.003          | 0.19±0.001            |                                           |                                                                   |                                                                                                            |
| 100 eq. each HH-I-3/9/10                                | <0.005                                     | 0.016±0.003         | 0.17±0.01             | 0.026±0.008                               | 0.12±0.004                                                        | 0.92                                                                                                       |
| 300 eq. r(N <sub>6</sub> )                              | <0.005                                     | 0.071±0.016         | 0.10±0.05             | 0.027±0.002                               | 0.099±0.005                                                       | 0.73                                                                                                       |
| 200 eq. r(N <sub>6</sub> )                              | 0.010±0.003                                | 0.089±0.004         | 0.19±0.01             |                                           |                                                                   |                                                                                                            |
| 100 eq. r(N <sub>6</sub> )                              | 0.098±0.005                                | 0.18±0.003          | 0.21±0.004            |                                           |                                                                   |                                                                                                            |
| 30 eq. r(N <sub>6</sub> )                               | 0.33±0.02                                  | 0.28±0.008          | 0.27±0.02             |                                           |                                                                   |                                                                                                            |
| 200 eq. r(N <sub>6</sub> ) + 100 eq. r(N <sub>5</sub> ) | 0.0057±0.001                               | 0.059±0.001         | 0.17±0.007            | 0.043±0.004                               | 0.11±0.004                                                        | 0.51                                                                                                       |
| 300 eq. r(N <sub>6</sub> )                              | 0.067±0.002                                | 0.12±0.01           | 0.21±0.03             |                                           |                                                                   |                                                                                                            |

**Supplementary Information Table 2. Cleavage rates for hammerhead ribozyme systems in presence and absence of inhibitor oligonucleotides.** Errors for encapsulated systems without inhibitor, with **HH-I-3/9/10**, and with 300 eq. **r(N<sub>6</sub>)** are S.E.M., N=4; encapsulated systems with 200 eq. **r(N<sub>6</sub>)**, 100 eq. **r(N<sub>5</sub>)** are extreme values, N=2. Errors for unencapsulated systems without inhibitor, with **HH-I-3/9/10**, and with 300 eq. **r(N<sub>6</sub>)** are S.E.M, N=3; Errors for other unencapsulated single-inhibitor systems and random inhibitor systems are S.D. from linear fit of  $\ln(S/S_0)$  vs. time in hours. Rates were determined over 2-4 h time intervals.

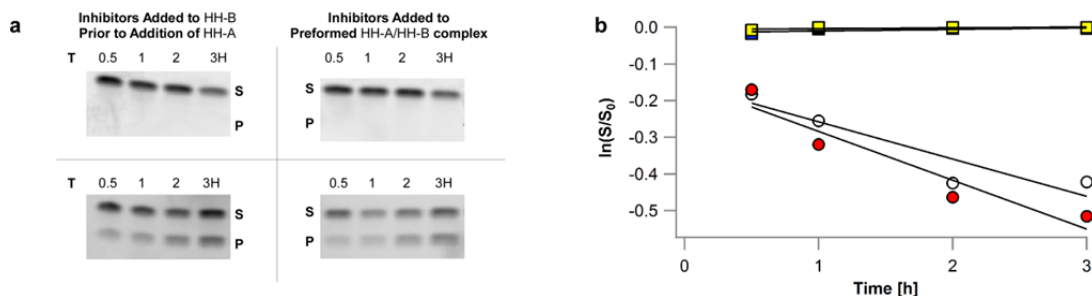

**Supplementary Information Figure 4. Inactive Inhibitor-HH-B complexes capable of activation by dilution are formed regardless of order of addition.** In typical reactions, **HH-B** and inhibitors were mixed with all reaction components except **HH-A** and  $\text{MgCl}_2$ , resulting in formation of a **HH-B**-inhibitor complex; **HH-A** was then added, and a portion of the reaction containing  $10 \mu\text{M}$  **HH-A/HH-B** was diluted to produce  $0.1 \mu\text{M}$  samples, then  $\text{MgCl}_2$  was added to each sample, resulting in a ribozyme that was inactive at  $10 \mu\text{M}$  **HH-A/HH-B** concentration and active at  $0.1 \mu\text{M}$  **HH-A/HH-B** concentration. Electropherograms are shown at left in panel **a**. Substrate (**HH-A**) is denoted as **S**, cleavage product is denoted as **P**. Kinetic plots are shown in panel **b**. Calculated  $k_{\text{HH-A}=\text{HH-B}=(10 \mu\text{M})} < 0.005 \text{ h}^{-1}$  (blue squares, overlapped by preformed **HH-A-HH-B** complex series described below, denoted by yellow squares),

$k_{\text{HH-A}=\text{HH-B}=(0.1 \mu\text{M})} = 0.10 \pm 0.03 \text{ h}^{-1}$  (white circles) ( $N=1$ , error is SD from curve fit).

In order to demonstrate that even preformed **HH-A-HH-B** complexes could form inhibitor complexes, **HH-A** and **HH-B** were mixed with all reaction components except **HH-I-3/9/10** and  $\text{MgCl}_2$ . **HH-I-3/9/10** were then added, diluted (if applicable), and  $\text{MgCl}_2$  was added. Electropherograms are shown at left in panel **a**. Substrate (**HH-A**) is denoted as **S**, cleavage product is denoted as **P**. Kinetic plots are shown in panel **b**. Calculated  $k_{\text{HH-A}=\text{HH-B}=(10 \mu\text{M})} < 0.005 \text{ h}^{-1}$  (yellow squares),  $k_{\text{HH-A}=\text{HH-B}=(0.1 \mu\text{M})} = 0.13 \pm 0.03 \text{ h}^{-1}$  (red circles) ( $N=1$ , error is SD from curve fit).

$k_{\text{HH-A}=\text{HH-B}=(10 \mu\text{M})} < 0.005 \text{ h}^{-1}$  (yellow squares),  $k_{\text{HH-A}=\text{HH-B}=(0.1 \mu\text{M})} = 0.13 \pm 0.03 \text{ h}^{-1}$  (red circles) ( $N=1$ , error is SD from curve fit).

$k_{\text{HH-A}=\text{HH-B}=(10 \mu\text{M})} < 0.005 \text{ h}^{-1}$  (yellow squares),  $k_{\text{HH-A}=\text{HH-B}=(0.1 \mu\text{M})} = 0.13 \pm 0.03 \text{ h}^{-1}$  (red circles) ( $N=1$ , error is SD from curve fit).

$k_{\text{HH-A}=\text{HH-B}=(10 \mu\text{M})} < 0.005 \text{ h}^{-1}$  (yellow squares),  $k_{\text{HH-A}=\text{HH-B}=(0.1 \mu\text{M})} = 0.13 \pm 0.03 \text{ h}^{-1}$  (red circles) ( $N=1$ , error is SD from curve fit).

$k_{\text{HH-A}=\text{HH-B}=(10 \mu\text{M})} < 0.005 \text{ h}^{-1}$  (yellow squares),  $k_{\text{HH-A}=\text{HH-B}=(0.1 \mu\text{M})} = 0.13 \pm 0.03 \text{ h}^{-1}$  (red circles) ( $N=1$ , error is SD from curve fit).



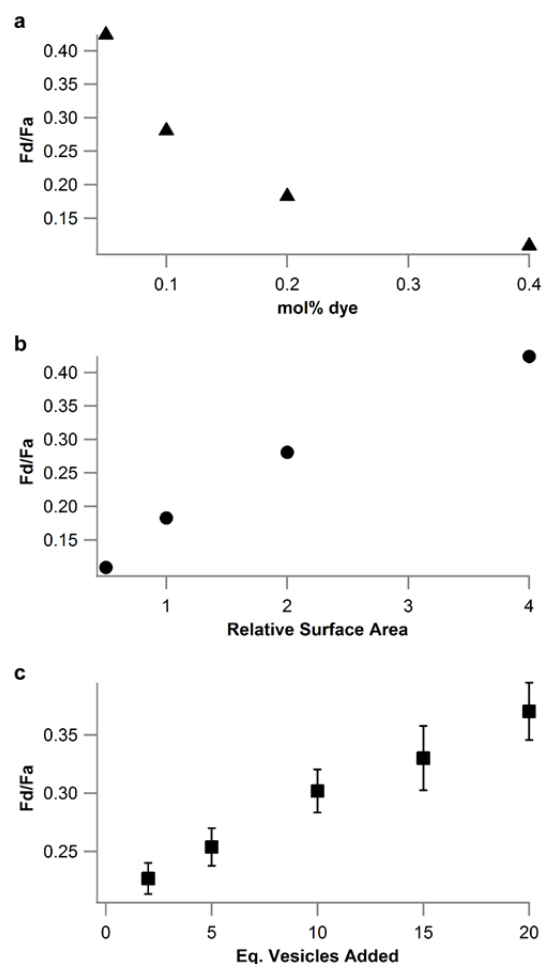

**Supplementary Information Figure 5. Calibration curve and growth of MA/GMO/DOPA vesicles in the presence of MA/GMO vesicles.** A calibration curve was generated for 100 nm vesicles containing lipid FRET dyes (panel **a**) and converted to a calibration curve for final relative surface area relative to initial surface area (panel **b**). 10% DOPA MA/GMO vesicles containing 0.2% FRET dyes were then mixed with pure MA/GMO vesicles and growth was monitored by FRET (panel **c**). The addition of 20 equivalents of pure MA/GMO vesicles to 10% DOPA MA/GMO vesicles resulted in a change of Fd/Fa equivalent to a ca. 3-fold increase in surface area, or a ca. 5-fold increase in volume, given spherical vesicles (error bars represent extreme values, N=2).

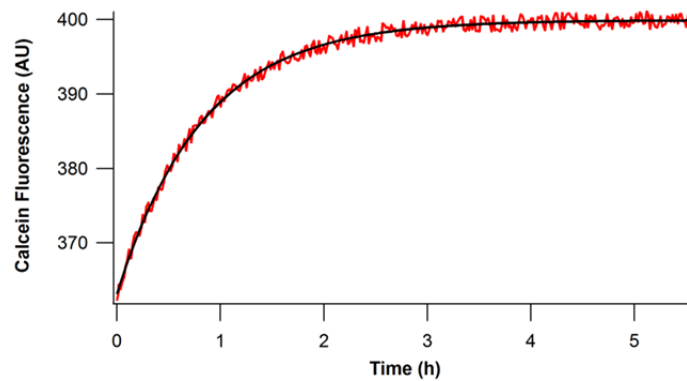

**Supplementary Information Figure 6. Volume growth of MA/GMO/DOPA vesicles.**

MA/GMO/DOPA vesicles (100 mM total lipid concentration) in 250 mM tris-HCl, pH 8, containing 20 mM calcein and purified from unencapsulated calcein by size-exclusion chromatography, were mixed with 20 eq. MA/GMO vesicles of the same total lipid concentration. Volume equilibration of these vesicles was monitored by observing the fluorescence signal ( $\lambda_{\text{ex}}=415$  nm,  $\lambda_{\text{em}}=600$  nm) associated with encapsulated calcein dequenching as buffer and water equilibrated across the enlarged membrane. The rate of fluorescence recovery was single-exponential, with  $k_{\text{app}}=1.26\pm 0.02$  h<sup>-1</sup> (error represents extreme values, N=2).

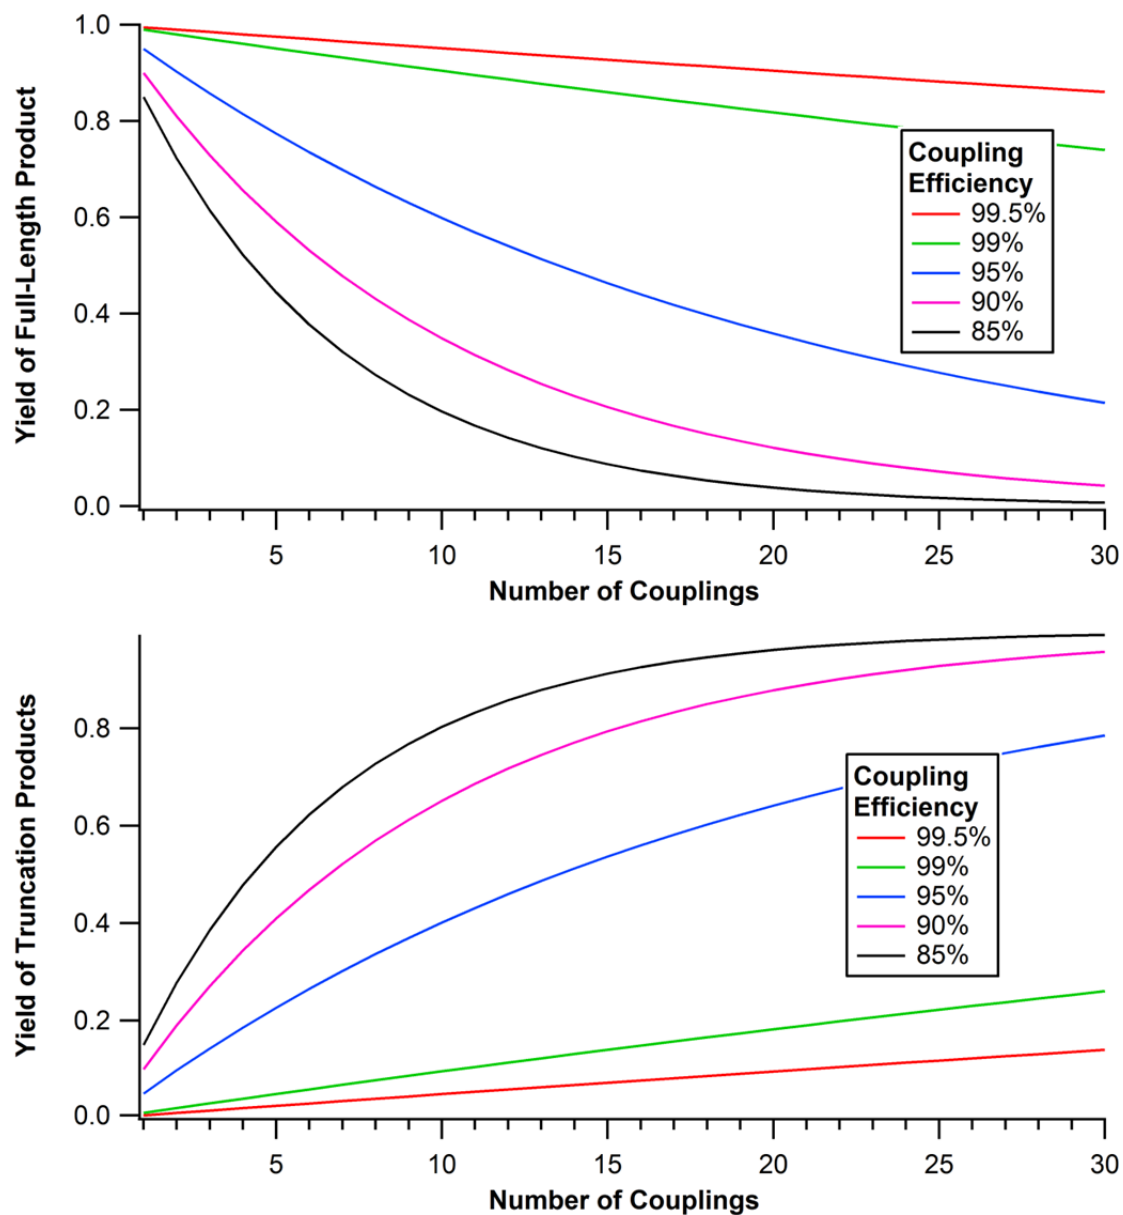

**Supplementary Information Figure 7. Yields of full-length RNA products (a) and truncation products (b) predicted based on stepwise coupling efficiency.** Even at 99.5% coupling efficiency, only 86% full-length product is produced in a 30-coupling reaction (Panel a). At 99% coupling efficiency, 73% full-length product is produced; at 95% coupling efficiency, 20% full-length product is produced; at 90% coupling efficiency, 3.8% full-length product is produced, and at 85% coupling efficiency, only 0.6% full-length product is produced.

Conversely, even at fairly high coupling efficiencies (95%), truncation products are the predominant reaction products in stepwise RNA synthesis beyond 14 nt (Panel **b**). At this coupling efficiency, a 30-coupling RNA synthesis will produce 79% truncation products. At 85% coupling efficiency, the synthesis of RNA larger than 5 nt will produce mostly truncation products. At this coupling efficiency, a 30-coupling RNA synthesis will produce >99% truncation products.

While the above data represent a simple arithmetic model of stepwise synthesis, the lower range of rates is comparable to or higher than those of the most highly evolved ribozyme polymerases known; the tC19 polymerase exhibits a termination rate of 7% (i.e., 93% extension efficiency), and the R18 polymerase exhibits a termination rate of 40% (60% coupling efficiency). tC19 can elongate a primer by 91+nt with 0.035% full-length yield, corresponding to 92% extension efficiency. Consistent with this, polymerization reactions catalyzed by these enzymes produce large amounts of truncation products relative to full-length product<sup>13, 14</sup>. Additionally, it is likely that nonspecific RNA degradation would contribute to the pool of short oligonucleotides, given that unconstrained RNA linkages exhibit a rate of transesterification-based degradation 2-3 orders of magnitude higher than those found in structured RNAs<sup>15</sup>.

| <b>Stepwise Efficiency</b> | <b>30-coupling yield</b> | <b>1-10 coupling yield over 30 couplings</b> | <b>[Short]/[Full Length]</b> | <b>[Short] if reaction generates 10<math>\mu</math>M full-length product (<math>\mu</math>M)</b> |
|----------------------------|--------------------------|----------------------------------------------|------------------------------|--------------------------------------------------------------------------------------------------|
| 99.5%                      | 86%                      | 4.9%                                         | 0.06                         | 0.6                                                                                              |
| 99%                        | 73%                      | 9.6%                                         | 0.13                         | 1.3                                                                                              |
| 95%                        | 20%                      | 40%                                          | 2.0                          | 20                                                                                               |
| 90%                        | 3.8%                     | 65%                                          | 17                           | 170                                                                                              |
| 85%                        | 0.6%                     | 80%                                          | 120                          | 1200                                                                                             |

**Supplementary Information Table 3. Relative yields and concentrations of full-length and short RNAs predicted based on stepwise coupling efficiency.** Even at very high coupling efficiencies (ca. 95% and below), more short truncation products (1-10 couplings, i.e., 2-11 nt) are generated than full-length products (30 couplings, i.e., 31 nt). At more modest, but still high (85%), coupling efficiencies, short oligomers are expected to be produced in large (>100-fold) excess.

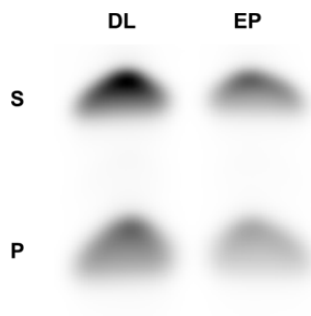

**Supplementary Information Figure 8. Control ethanol precipitation demonstrating**

**identical recovery of HH-A and its ribozyme cleavage product.** Representative

unencapsulated hammerhead cleavage reactions (10  $\mu$ M **HH-A/HH-B**, 250 mM tris-HCl pH 8, 4 mM MgCl<sub>2</sub>, 10  $\mu$ L reaction volume) after 65 min reaction time were subjected to a) dilution into 10  $\mu$ L loading buffer and loading 10  $\mu$ L of the resulting mixture directly onto the gel (lane labeled **DL**), or b) mixing with 300  $\mu$ L MA/GMO/DOPA vesicles (60 mM/30 mM/10 mM), ethanol precipitation and washing, followed by resuspension in 12  $\mu$ L loading buffer and loading 10  $\mu$ L onto the gel (lane labeled **EP**). The ribozyme cleavage product yield (ribozyme cleavage product labeled **P**, uncleaved **HH-A** ribozyme substrate labeled **S**) was identical in both lanes (46%).

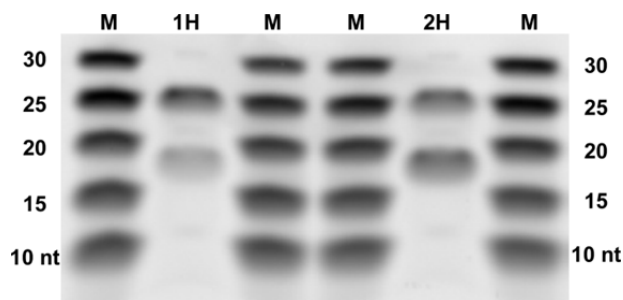

**Supplementary Information Figure 9. Electropherogram showing HH-A and cleavage product alongside RNA size marker ladder.** A representative hammerhead cleavage reaction (10  $\mu$ M **HH-A/HH-B**, 250 mM tris-HCl pH 8, 4 mM MgCl<sub>2</sub>) was stopped at 1 H and 2 H by addition to 8 M urea, 1 X TBE containing 20 mM supplemental EDTA. Fluorescein end-labeled products (lanes labeled **1H** and **2H**) were analyzed by PAGE alongside a size marker ladder consisting of fluorescein-labeled 10, 15, 20, 25, and 30 nt ssRNA oligonucleotides (lanes labeled **M**), demonstrating the cleavage product is of the expected length (19 nt). Imaging was performed using the fluorescein channel of a Typhoon gel scanner as described in the Methods section. All inhibitors used in this study were of shorter length (5-7 nt) than the smallest band in the size marker ladder (10 nt).

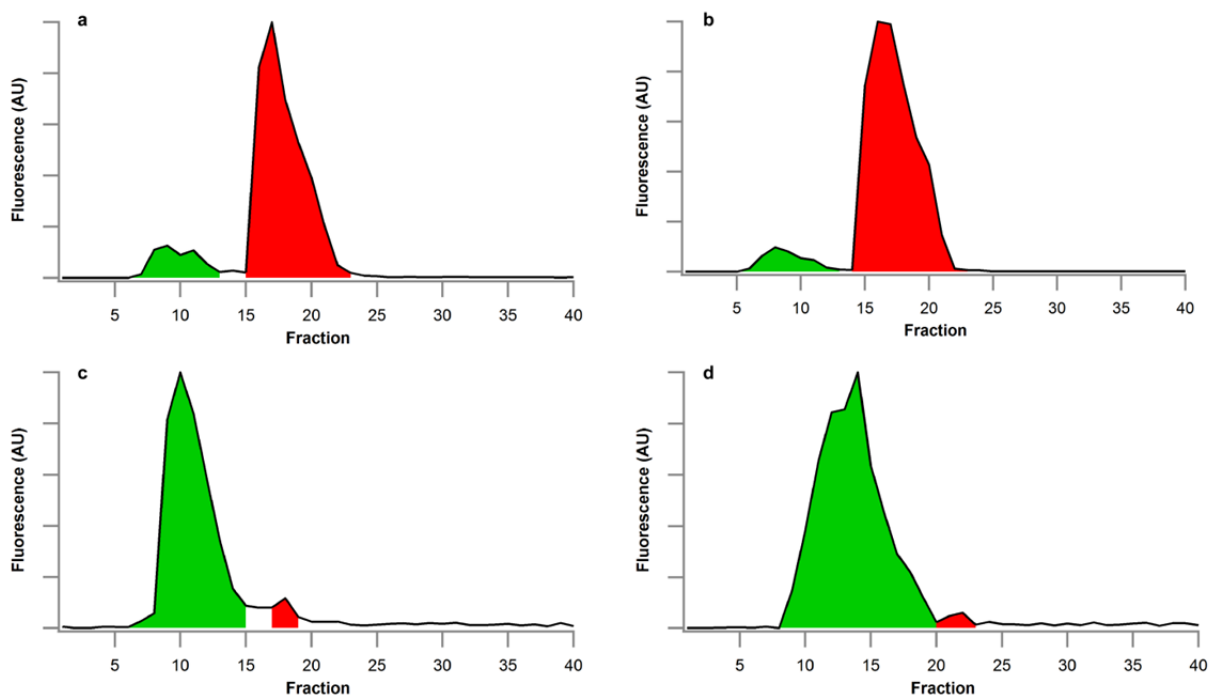

**Supplementary Information Figure 10. Repurification of vesicles demonstrating**

**oligonucleotide contents are retained on the experimental timescale.** Initial Sephadex 4B purification traces (monitored by fluorescein emission) of MA/GMO/DOPA vesicles containing 10  $\mu$ M **HH-A** (a) or 100  $\mu$ M **FAM-DNA-HH-I-3** (b) and repurification traces of the same vesicles mixed with 20 eq. MA/GMO vesicles, tumbled for 3 H, allowing for > 90-95% volume relaxation (Supplementary Information Figure 6), 4 mM  $MgCl_2$  added, then tumbled for an additional 4 H (c for **HH-A**, d for **FAM-DNA-HH-I-3**). The repurification trace demonstrates  $\geq 90-95\%$  retention of both oligonucleotides on this timescale. In each trace, the green shaded region denotes the encapsulated oligonucleotide fraction, and the red shaded region denotes the unencapsulated oligonucleotide fraction.
